# Supplementary material
Source: publisher figshare collection journal article supplement (https://sage.figshare.com/ndownloader/files/15618986)
Supplement: Supplementary file 1 [file 15618986]

## Supplementary Information

**Table 1:** Demographic and clinical characteristics of patients

|                                                                                                                                                 | Schizophrenia:<br>Standard<br>community<br>sample | Schizophrenia:<br>High needs<br>community<br>sample | Schizophrenia:<br>Combined<br>community<br>samples | BPAD:<br>Combined<br>community<br>sample |
|-------------------------------------------------------------------------------------------------------------------------------------------------|---------------------------------------------------|-----------------------------------------------------|----------------------------------------------------|------------------------------------------|
| Sample size                                                                                                                                     | 83                                                | 93                                                  | 176                                                | 26                                       |
| Male (%)                                                                                                                                        | 57%                                               | 61%                                                 | 59%                                                | 54%                                      |
| Age                                                                                                                                             | 49.1 (11.0)                                       | 47.4 (11.0)                                         | 48.1 (11.4)                                        | 48.5 (13.2)                              |
| Diagnosis<br><br>Paranoid<br>schizophrenia:<br>schizoaffective<br>disorder:<br>other<br>psychotic<br>disorder<br>(F22.0, F20.3,<br>F20.9): BPAD | 63:14:6                                           | 77:14:2                                             | 140:28:8                                           |                                          |
| Treatment<br>resistant                                                                                                                          | 41 (49%)                                          | 58 (62%)                                            | 99 (56%)                                           | 5 (19%)                                  |
| Treatment<br>resistant<br>patients never<br>treated with<br>clozapine                                                                           | 24 (59%)                                          | 27 (47%)                                            | 51 (52%)                                           | 5 (100%)                                 |
| Mean number<br>of<br>antipsychotic<br>trials in<br>patients with<br>TRS not<br>currently on<br>clozapine                                        | 2.9 (2-7)                                         | 3.2 (2-7)                                           | 3.0 (2-7)                                          |                                          |

**Table 2:** Comparison of study criteria for Treatment Resistant Schizophrenia with criteria from the TRIPP guidelines (Howes et al., 2017)

|                                                 | <b>TRIPP guidelines minimum requirements for diagnosis of treatment resistance</b>                                                                                                                                                                                                                               | <b>Study Criteria</b>                                                                                                                                              |
|-------------------------------------------------|------------------------------------------------------------------------------------------------------------------------------------------------------------------------------------------------------------------------------------------------------------------------------------------------------------------|--------------------------------------------------------------------------------------------------------------------------------------------------------------------|
| Symptom: severity                               | At least moderate severity on standardized rating scale                                                                                                                                                                                                                                                          | No symptom scale used                                                                                                                                              |
| Symptom: Duration                               | ≥ 12 weeks                                                                                                                                                                                                                                                                                                       | ≥ 12 weeks                                                                                                                                                         |
| Symptom: Functioning                            | At least moderate functional impairment measured using a validated scale                                                                                                                                                                                                                                         | No symptom scale used                                                                                                                                              |
| Adequate treatment: assessment of past response | Information to be gathered from patient/carer reports, staff and case notes, pill counts and dispensing charts                                                                                                                                                                                                   | Information obtained from case notes                                                                                                                               |
| Adequate treatment: duration                    | ≥6 weeks at a therapeutic dosage                                                                                                                                                                                                                                                                                 | ≥6 weeks at a therapeutic dosage                                                                                                                                   |
| Adequate treatment: dosage                      | Equivalent to ≥600 mg of chlorpromazine per day                                                                                                                                                                                                                                                                  | An adequate treatment trial was defined as treatment dose within the British National Formulary ( <a href="http://www.bnf.org">www.bnf.org</a> ) therapeutic range |
| Adequate treatment: current adherence           | <p>≥2 past adequate treatment episodes with different antipsychotic drugs.</p> <p>≥80% of prescribed doses taken. Adherence should be assessed using at least two sources (pill counts, dispensing chart reviews, and patient/carer report). Antipsychotic plasma levels monitored on at least one occasion.</p> | <p>≥2 past adequate treatment episodes with different antipsychotic drugs.</p> <p>Adherence assessed using case notes only.</p>                                    |

Howes OD, McCutcheon R, Agid O, et al. (2017) Treatment-Resistant Schizophrenia: Treatment Response and Resistance in Psychosis (TRIP) Working Group Consensus Guidelines on Diagnosis and Terminology. *Am J Psychiatry* 174: 216-229.
